# Supplementary material
Source: PubMed Central journal article supplement (PMC2996705)

# SI Appendix

Table 1: Annual percentage of precipitation affected by the glaciers (AP), MMP, and the month of occurrence of the MMP for each altitude band. Numbers in parentheses denote month of MMP.

| Basin name   | at $z_0$ | altitude bands |           |           |           |           | Parameter       |
|--------------|----------|----------------|-----------|-----------|-----------|-----------|-----------------|
|              |          | 0 %            | 25 %      | 50 %      | 75 %      | 100 %     |                 |
| Aral Sea     | 78.72    | 5.83           | 2.41      | 1.88      | 1.7       | 1.53      | AP [%]          |
|              |          | 37.36 (8)      | 26.42 (8) | 23.95 (8) | 21.78 (8) | 18.84 (8) | MMP [%] (month) |
| Brahmaputra  | 17.01    | 0.98           | 0.59      | 0.33      | 0.22      | 0.17      | AP [%]          |
|              |          | 2.26 (9)       | 1.34 (9)  | 0.78 (9)  | 0.53 (9)  | 0.41 (9)  | MMP [%] (month) |
| Clutha River | 38.83    | 1.17           | 0.83      | 0.67      | 0.56      | 0.49      | AP [%]          |
|              |          | 6.36 (2)       | 4.51 (2)  | 3.62 (2)  | 3.00 (2)  | 2.55 (2)  | MMP [%] (month) |
| Danube       | 52.52    | 4.39           | 0.2       | 0.12      | 0.08      | 0.07      | AP [%]          |
|              |          | 11.30 (8)      | 0.63 (8)  | 0.36 (8)  | 0.27 (8)  | 0.22 (8)  | MMP [%] (month) |
| Ganges       | 33.11    | 5.01           | 0.42      | 0.26      | 0.18      | 0.13      | AP [%]          |
|              |          | 13.83 (6)      | 1.09 (6)  | 0.72 (6)  | 0.53 (6)  | 0.33 (6)  | MMP [%] (month) |
| Huang He     | 24.47    | 0.06           | 0.01      | 0.01      | 0.01      | 0.00      | AP [%]          |
|              |          | 0.16 (8)       | 0.03 (8)  | 0.02 (8)  | 0.01 (8)  | 0.01 (8)  | MMP [%] (month) |
| Indigirka    | 40.39    | 1              | 0.16      | 0.09      | 0.07      | 0.06      | AP [%]          |
|              |          | 3.42 (7)       | 0.55 (7)  | 0.31 (7)  | 0.24 (7)  | 0.20 (7)  | MMP [%] (month) |
| Indus        | 55.48    | 4.71           | 1.72      | 0.98      | 0.77      | 0.72      | AP [%]          |
|              |          | 11.64 (7)      | 4.89 (7)  | 2.13 (7)  | 1.50 (6)  | 1.40 (6)  | MMP [%] (month) |
| Irrawaddy    | 25.04    | 0.19           | 0.00      | 0.00      | 0.00      | 0.00      | AP [%]          |
|              |          | 0.45 (9)       | 0.01 (9)  | 0.00 (9)  | 0.00 (9)  | 0.00 (9)  | MMP [%] (month) |
| Kuban        | 53.02    | 2.23           | 0.69      | 0.45      | 0.35      | 0.28      | AP [%]          |
|              |          | 8.39 (8)       | 2.58 (8)  | 1.66 (8)  | 1.31 (8)  | 1.09 (8)  | MMP [%] (month) |
| Po           | 54.62    | 5.98           | 2.06      | 1.32      | 0.96      | 0.78      | AP [%]          |
|              |          | 19.93 (7)      | 8.21 (7)  | 5.88 (7)  | 4.58 (7)  | 3.84 (7)  | MMP [%] (month) |
| Rhine        | 43.71    | 2.94           | 0.5       | 0.31      | 0.22      | 0.17      | AP [%]          |
|              |          | 8.48 (7)       | 1.58 (7)  | 1.03 (7)  | 0.75 (7)  | 0.59 (7)  | MMP [%] (month) |
| Rhone        | 50.96    | 6.21           | 2.19      | 1.44      | 1.06      | 0.86      | AP [%]          |
|              |          | 21.92 (7)      | 9.50 (7)  | 6.59 (7)  | 4.99 (7)  | 4.19 (7)  | MMP [%] (month) |
| Rio Santa    | 26.5     | 5.54           | 2.82      | 1.94      | 1.54      | 1.41      | AP [%]          |
|              |          | 71.00 (7)      | 52.85 (7) | 43.67 (7) | 39.65 (7) | 36.24 (7) | MMP [%] (month) |
| Tarim        | 37.74    | 2.19           | 1.42      | 1.26      | 1.15      | 1.08      | AP [%]          |
|              |          | 5.56 (9)       | 3.36 (9)  | 2.95 (9)  | 2.71 (9)  | 2.54 (9)  | MMP [%] (month) |
| Yangtze      | 32.96    | 0.14           | 0.06      | 0.04      | 0.03      | 0.02      | AP [%]          |
|              |          | 0.36 (8)       | 0.17 (8)  | 0.11 (8)  | 0.08 (8)  | 0.07 (8)  | MMP [%] (month) |
| Yukon River  | 44.85    | 1.87           | 1.19      | 0.89      | 0.69      | 0.55      | AP [%]          |
|              |          | 4.24 (6)       | 2.60 (6)  | 1.92 (6)  | 1.52 (6)  | 1.30 (6)  | MMP [%] (month) |

Figures: Equivalents of Figure 1 for each of the basins included in this study, supplemented by the numeric values from table 1.

### Aral Sea

Total river basin area: 1234075 km<sup>2</sup>  
 Total glacier area: 11319 km<sup>2</sup> (0.92 % of total river basin area)  
 Mean annual precipitation: 309 mm  
 Total population: 41.01 Mio. people  
 Total PIX: 10.29 Mio. people

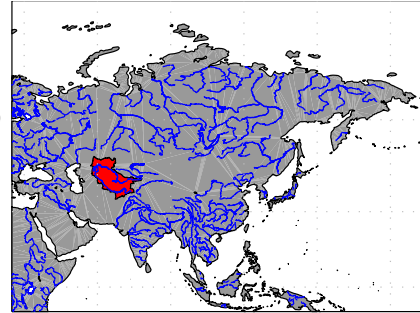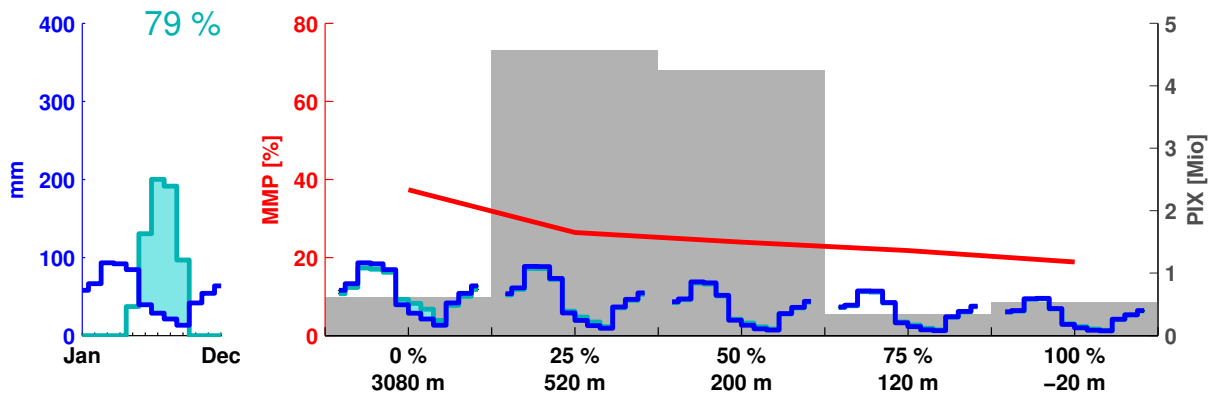

### Brahmaputra

Total river basin area: 527666 km<sup>2</sup>  
 Total glacier area: 16118 km<sup>2</sup> (3.05 % of total river basin area)  
 Mean annual precipitation: 1145 mm  
 Total population: 62.43 Mio. people  
 Total PIX: 0.31 Mio. people

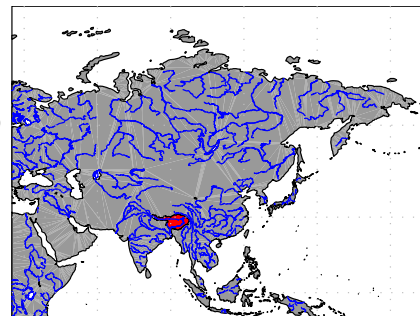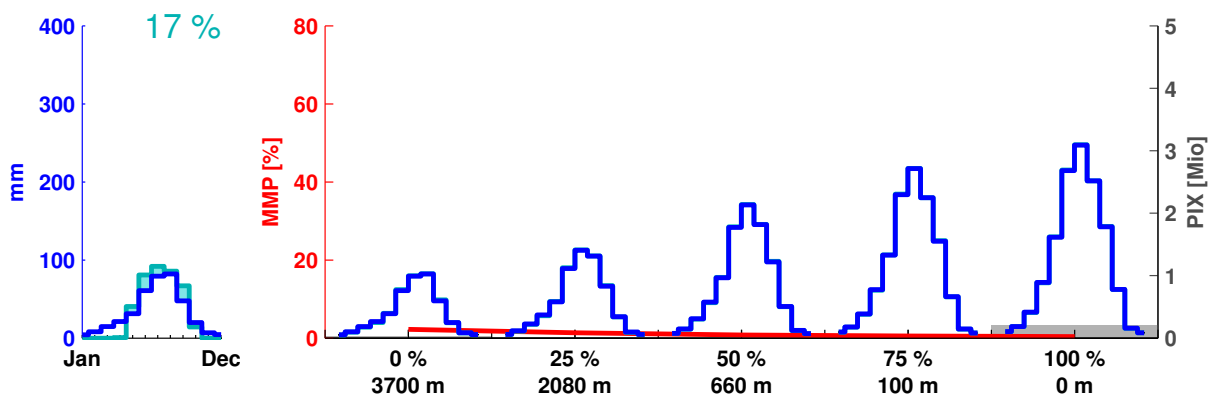

## Ganges

Total river basin area: 1023609 km<sup>2</sup>  
 Total glacier area: 12659 km<sup>2</sup> (1.24 % of total river basin area)  
 Mean annual precipitation: 1118 mm  
 Total population: 448.98 Mio. people  
 Total PIX: 2.40 Mio. people

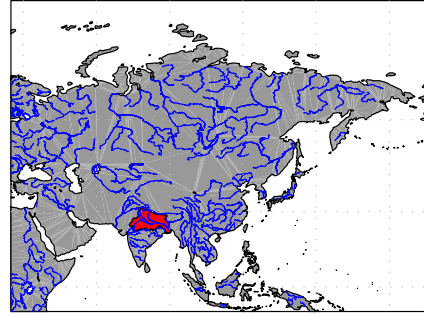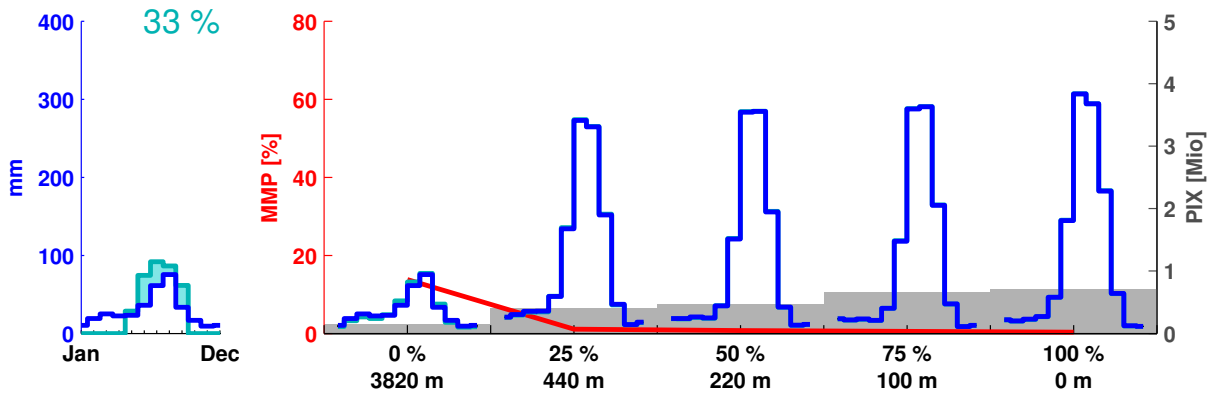

## Huang He (Yellow River)

Total river basin area: 988702 km<sup>2</sup>  
 Total glacier area: 172 km<sup>2</sup> (0.02 % of total river basin area)  
 Mean annual precipitation: 447 mm  
 Total population: 162.70 Mio. people  
 Total PIX: 0.02 Mio. people

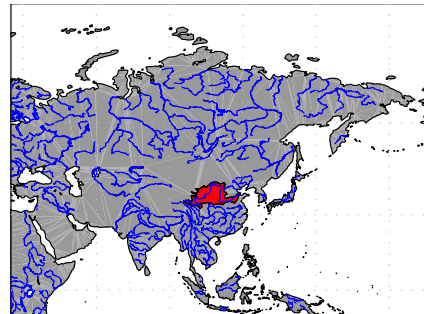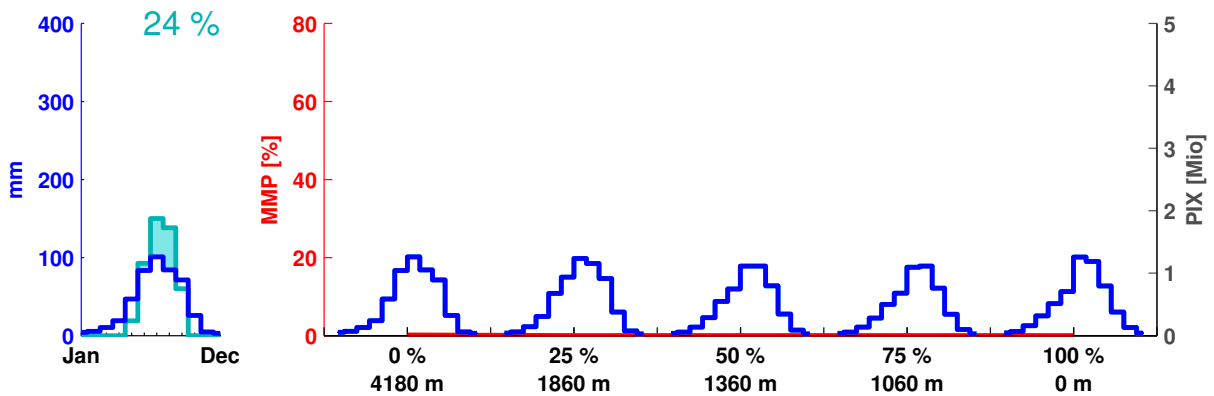

## Indigirka

Total river basin area: 341577 km<sup>2</sup>  
 Total glacier area: 338 km<sup>2</sup> (0.10 % of total river basin area)  
 Mean annual precipitation: 290 mm  
 Total population: 0.04 Mio. people  
 Total PIX: 0.00 Mio. people

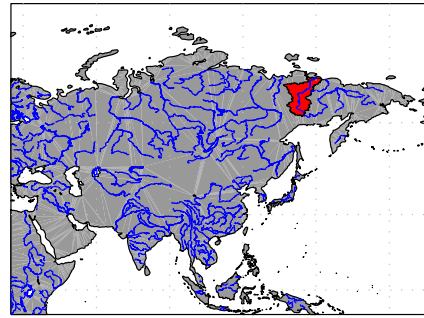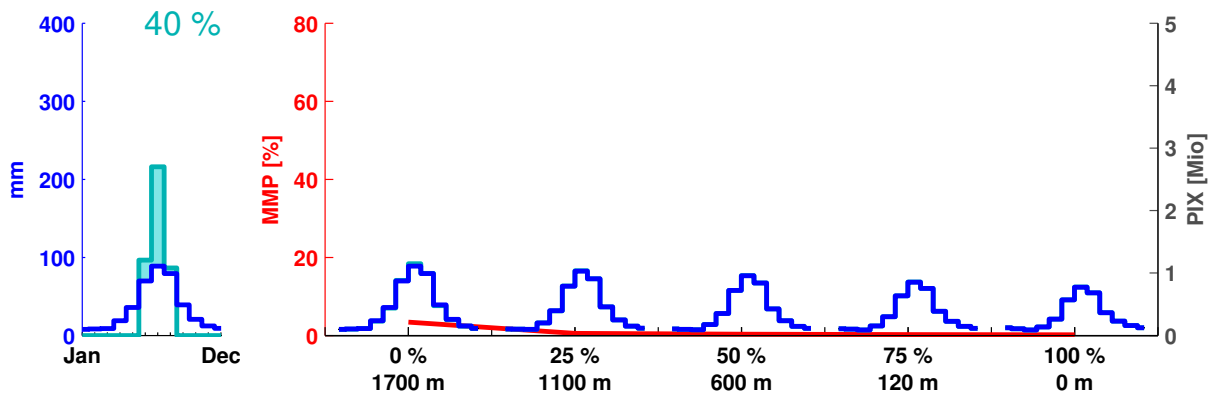

## Indus

Total river basin area: 1139814 km<sup>2</sup>  
 Total glacier area: 20325 km<sup>2</sup> (1.78 % of total river basin area)  
 Mean annual precipitation: 405 mm  
 Total population: 211.28 Mio. people  
 Total PIX: 4.82 Mio. people

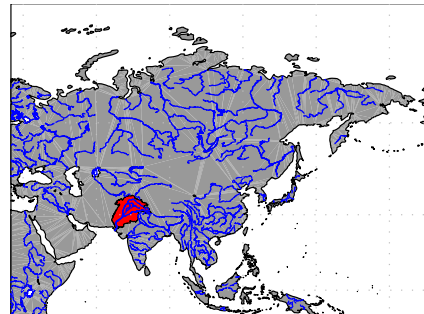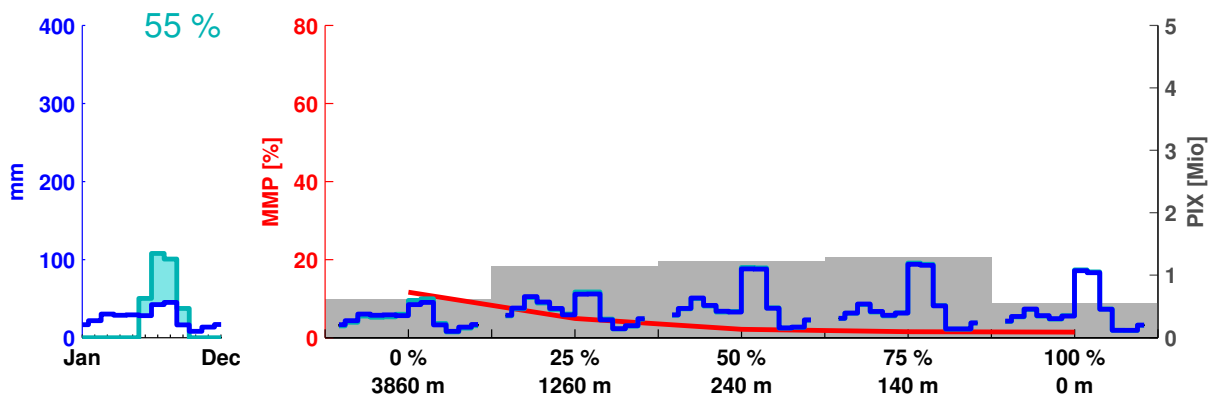

## Irrawaddy

Total river basin area: 410376 km<sup>2</sup>  
 Total glacier area: 25 km<sup>2</sup> (0.01 % of total river basin area)  
 Mean annual precipitation: 1775 mm  
 Total population: 35.26 Mio. people  
 Total PIX: 0.00 Mio. people

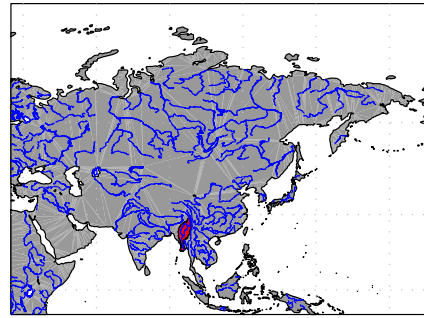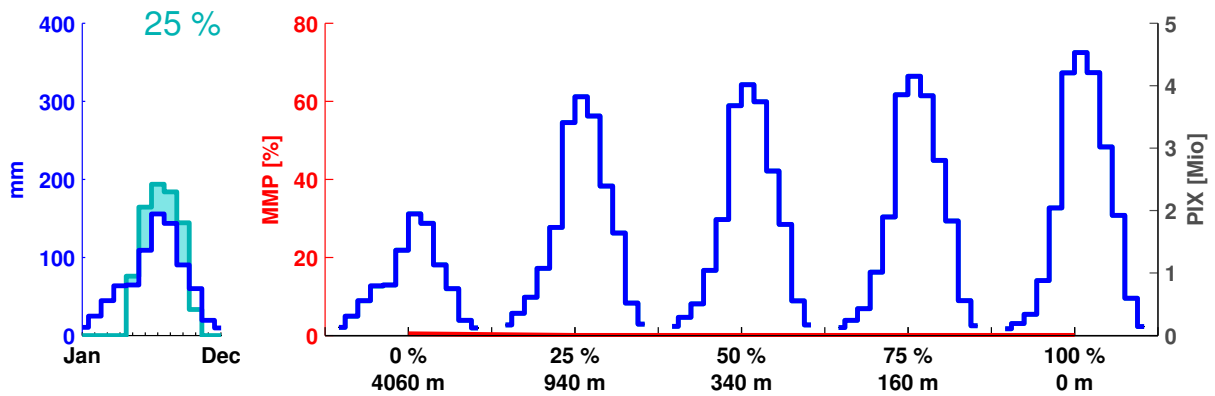

## Tarim

Total river basin area: 1053180 km<sup>2</sup>  
 Total glacier area: 20494 km<sup>2</sup> (1.95 % of total river basin area)  
 Mean annual precipitation: 87 mm  
 Total population: 9.22 Mio. people  
 Total PIX: 0.30 Mio. people

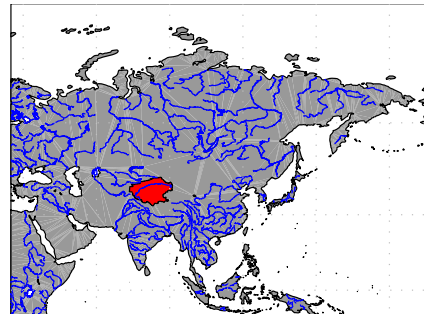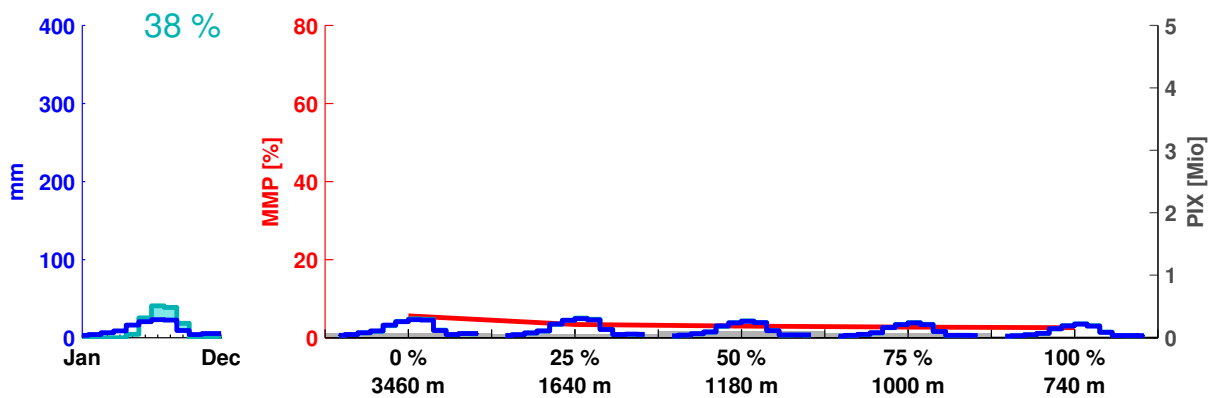

## Yangtze

Total river basin area: 1746593 km<sup>2</sup>  
 Total glacier area: 1895 km<sup>2</sup> (0.11 % of total river basin area)  
 Mean annual precipitation: 1062 mm  
 Total population: 383.04 Mio. people  
 Total PIX: 0.37 Mio. people

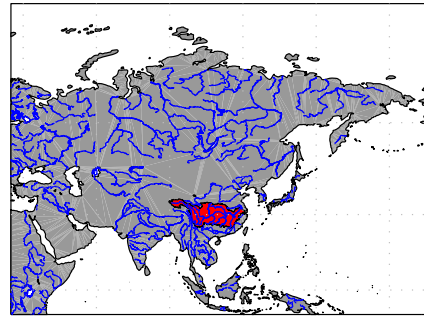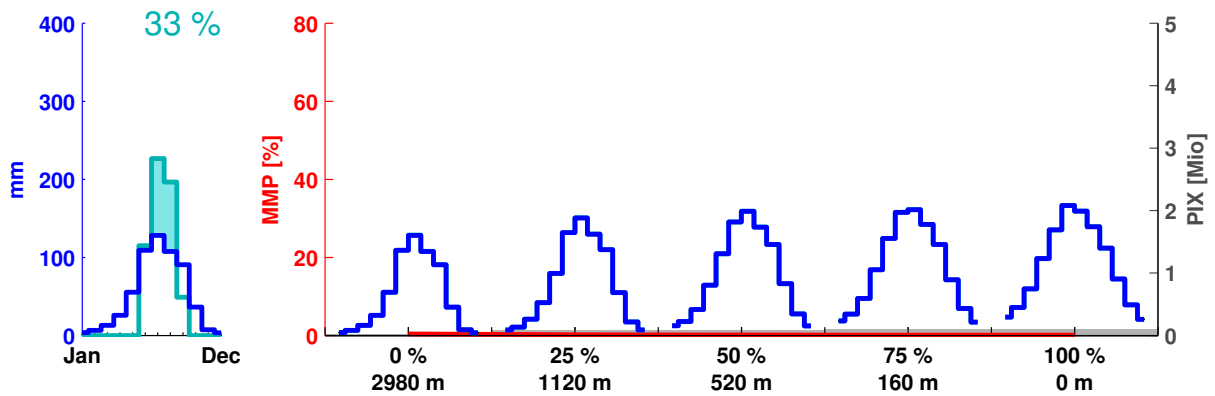

## Danube

Total river basin area: 794133 km<sup>2</sup>  
 Total glacier area: 617 km<sup>2</sup> (0.08 % of total river basin area)  
 Mean annual precipitation: 765 mm  
 Total population: 81.38 Mio. people  
 Total PIX: 0.31 Mio. people

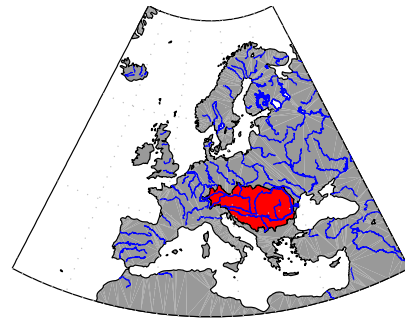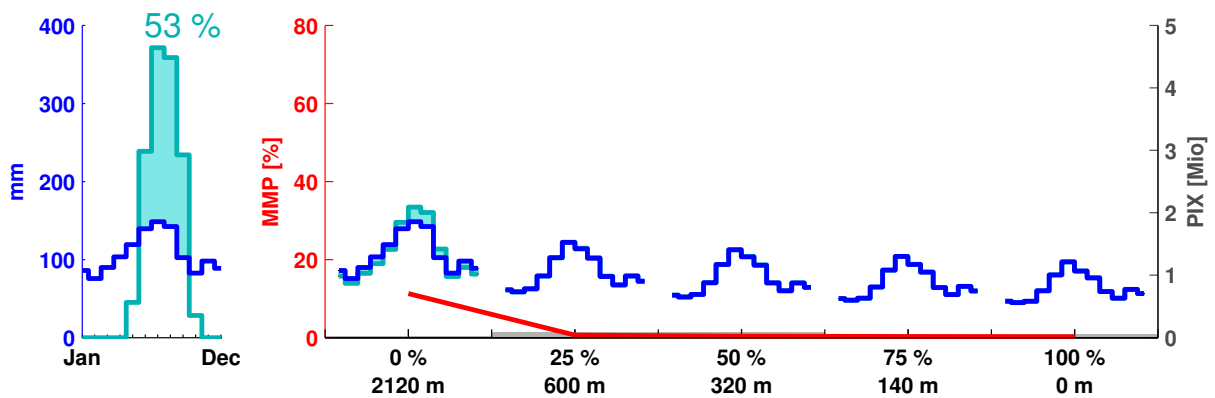

## Kuban

Total river basin area: 59120 km<sup>2</sup>  
 Total glacier area: 215 km<sup>2</sup> (0.36 % of total river basin area)  
 Mean annual precipitation: 843 mm  
 Total population: 3.45 Mio. people  
 Total PIX: 0.05 Mio. people

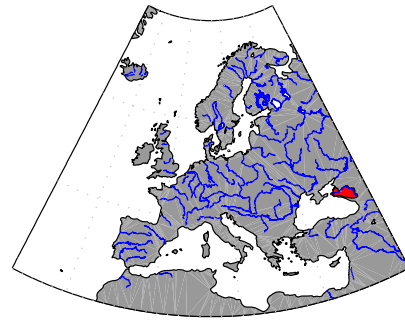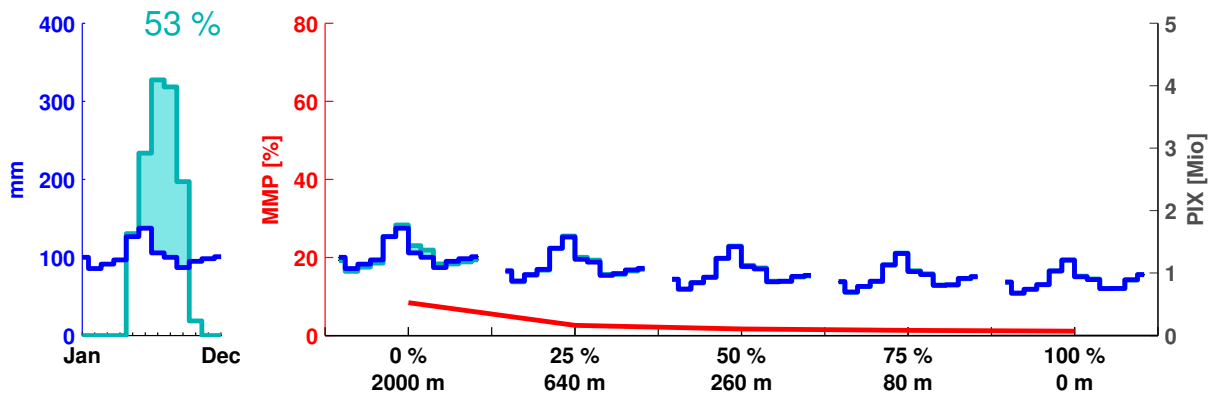

## Po

Total river basin area: 73297 km<sup>2</sup>  
 Total glacier area: 818 km<sup>2</sup> (1.12 % of total river basin area)  
 Mean annual precipitation: 1028 mm  
 Total population: 16.55 Mio. people  
 Total PIX: 0.81 Mio. people

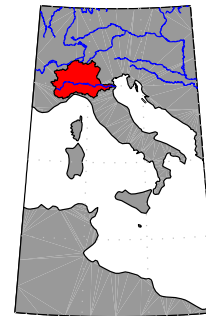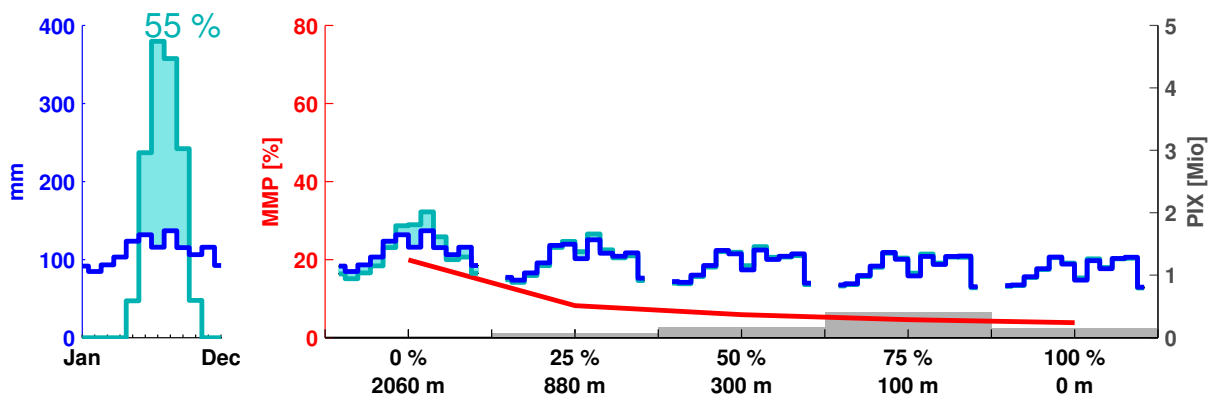

## Rhine

Total river basin area: 190713 km<sup>2</sup>  
 Total glacier area: 459 km<sup>2</sup> (0.24 % of total river basin area)  
 Mean annual precipitation: 864 mm  
 Total population: 59.07 Mio. people  
 Total PIX: 0.52 Mio. people

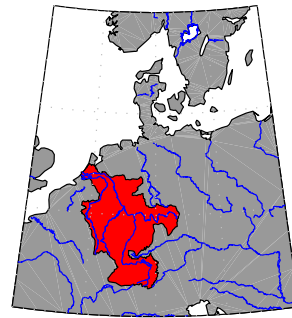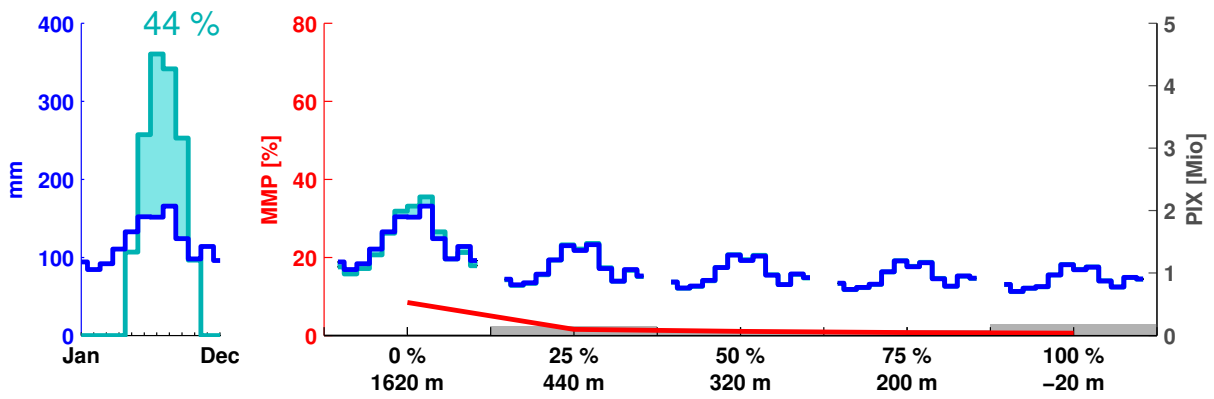

## Rhone

Total river basin area: 97702 km<sup>2</sup>  
 Total glacier area: 1162 km<sup>2</sup> (1.19 % of total river basin area)  
 Mean annual precipitation: 998 mm  
 Total population: 10.12 Mio. people  
 Total PIX: 0.57 Mio. people

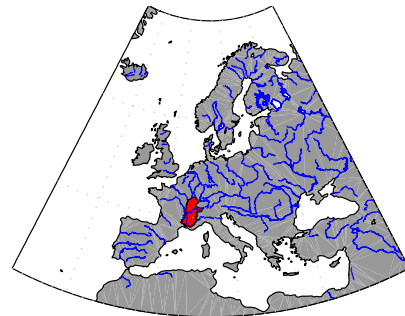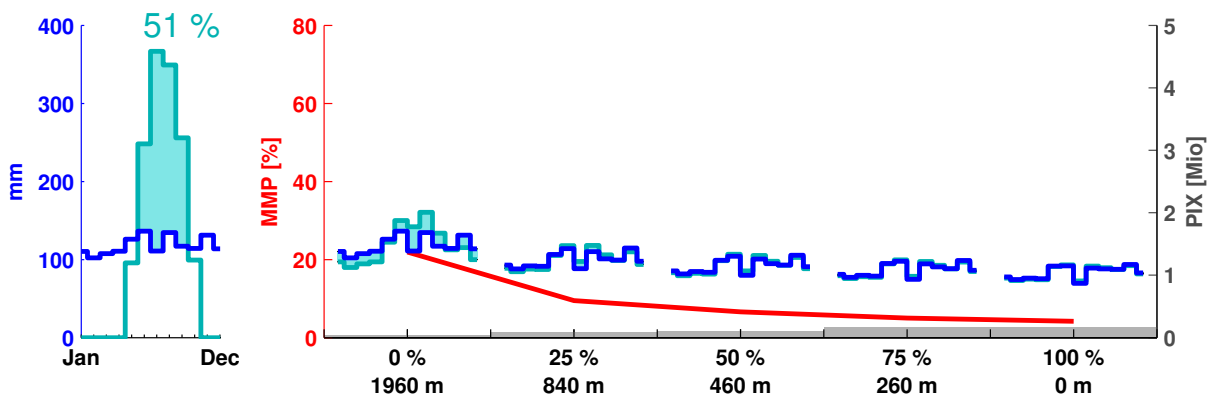



## Yukon River

Total river basin area: 830257 km<sup>2</sup>  
 Total glacier area: 9070 km<sup>2</sup> (1.09 % of total river basin area)  
 Mean annual precipitation: 301 mm  
 Total population: 0.13 Mio. people  
 Total PIX: 0.00 Mio. people

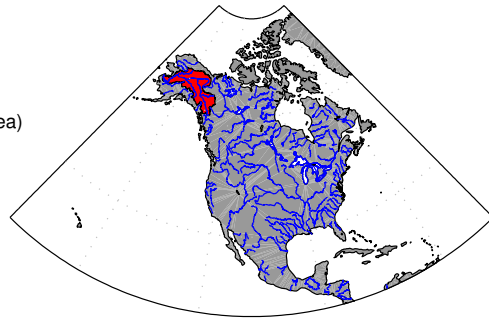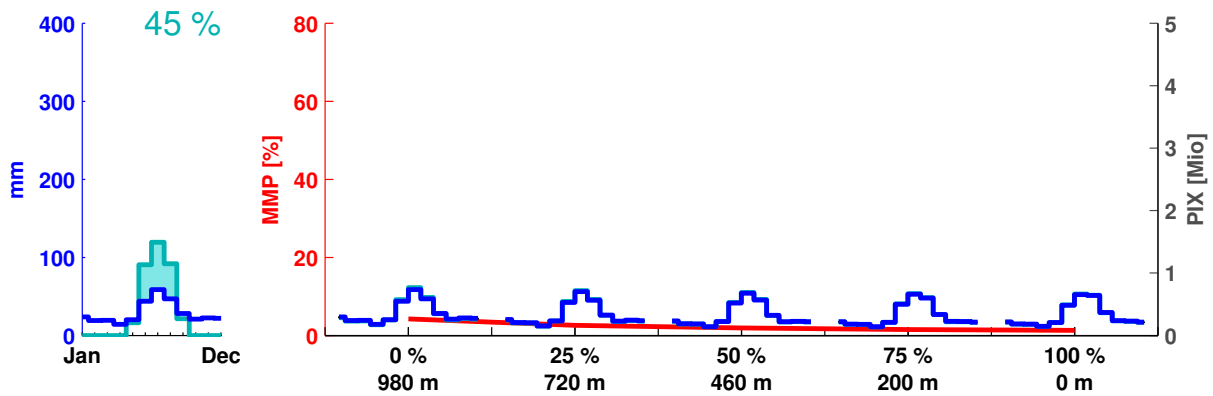

## Clutha River

Total river basin area: 17182 km<sup>2</sup>  
 Total glacier area: 147 km<sup>2</sup> (0.86 % of total river basin area)  
 Mean annual precipitation: 1172 mm  
 Total population: 0.03 Mio. people  
 Total PIX: 0.00 Mio. people

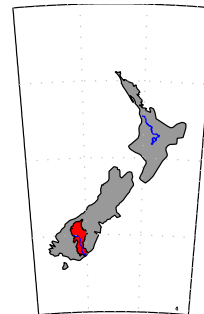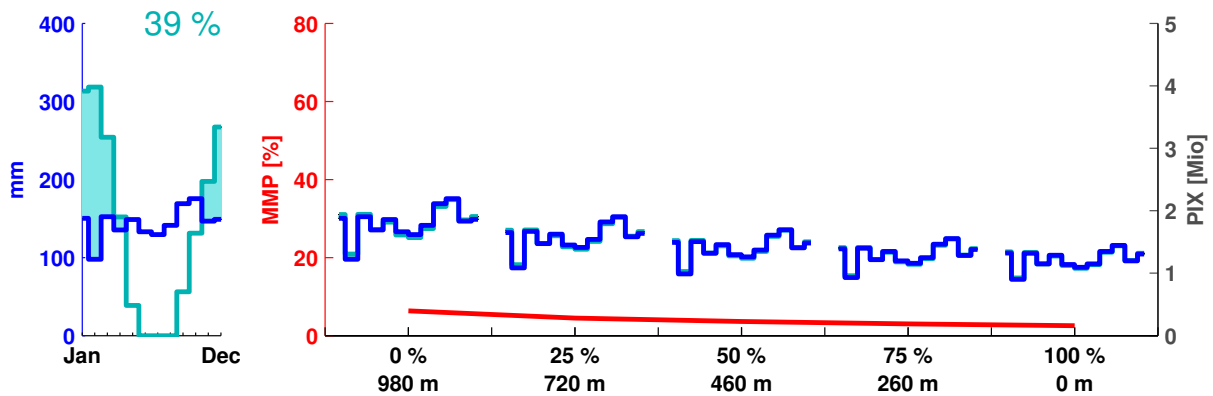

## Rio Santa

Total river basin area: 11901 km<sup>2</sup>  
 Total glacier area: 503 km<sup>2</sup> (4.23 % of total river basin area)  
 Mean annual precipitation: 603 mm  
 Total population: 0.57 Mio. people  
 Total PIX: 0.27 Mio. people

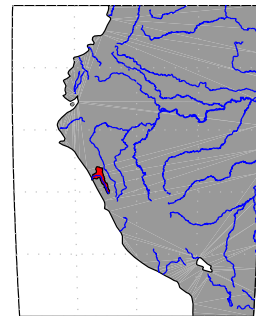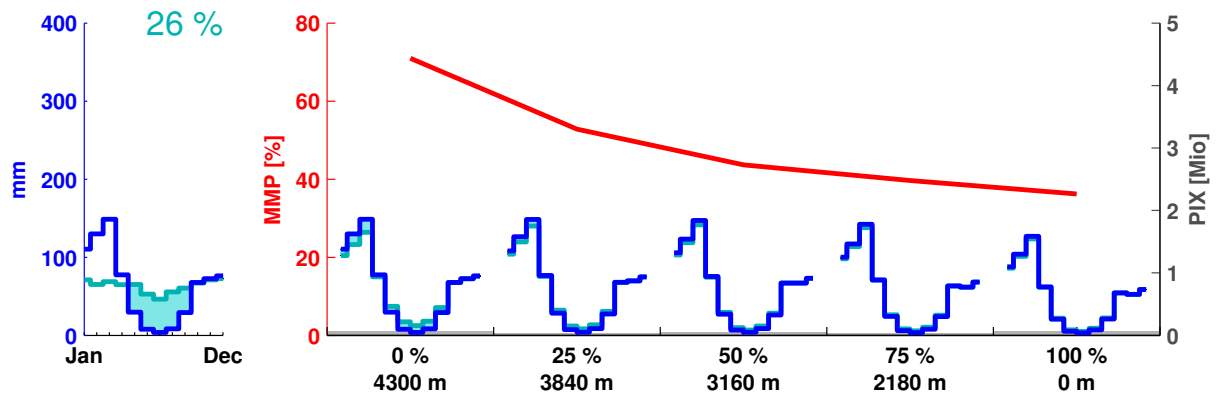

Supplement: 1008162107_Appendix.pdf [file 1008162107_Appendix.pdf]
